# Supplementary material for: Substrate cycles in Penicillium chrysogenum quantified by isotopic non-stationary flux analysis
Source: PubMed Central journal article supplement (PMC3538697; doi:10.1186/1475-2859-11-140), 2012-10-25
Supplement: 1475-2859-11-140-S1.pdf [file 1475-2859-11-140-S1.pdf]

# Supplement

---

## **<sup>13</sup>C metabolic model**

The metabolic model used in the <sup>13</sup>C flux analysis was derived from Table S2.

Besides the extensions introduced in the second section, several further adaptations were made: The most observable change is the removal of many reactions due to the absence of the corresponding metabolites in the <sup>13</sup>C simulation. These metabolites are either without carbon atoms or only conserved moieties. These reactions include: r10.1, r10.2, r10.3, r10.5, r10.9, r10.20, r11.11, r11.12, r12.1, r12.2, r13.1–r13.9, r14.1, and r15.1.  $\alpha$ -ketobutarate was also removed because its concentration was below the detection limit. This resulted in the lumping of r11.35, r11.36, and r11.37 into a modified r11.35 in the <sup>13</sup>C metabolic model. Similar lumping was also applied to the citruline transport reaction (r10.7), fatty acid synthesis (reactions r16.x), and C1-metabolism (r8.2, r8.3, and r8.5). Biomass formation reactions r18.18 and r18.3. These lumped reactions are named 'bm\_\*' in the <sup>13</sup>C metabolic model. To further reduce the size of the derived isotopomer model, the biosynthesis reactions of the ACV and the aromatic amino acids phenylalanine, tryptophan, and tyrosine were modeled as efflux reactions from the corresponding precursors cysteine, valine, serine, PRPP, PEP, E4P. The penicillin synthesis reactions r19.1, r19.2, r19.3, and r19.4 were also converted to effluxes from the respective precursors. To simulate the labeling of symmetrical metabolites, a pair of identical reactions using opposite atomic transitions were introduced: the reactions r4\_7x, r4\_7y, r4\_9x, r4\_9y, rz\_4a, and rz\_4a2. Finally, to keep compatibility with 13C-FLUX, all reactions in the <sup>13</sup>C metabolic model contain no more than two substrates and two products. In case more

than two reactants were present, reactions were split. This resulted in reactions r11\_21a, r11\_21b, r11\_32a, and r11\_32b.

## Mass isotopomer deconvolution

Fragmentation of metabolites increases the information content about the labeling distribution. Especially, when several fragments are measured, the data can be used to estimate further, non-measured linear combinations of isotopomers. Especially, relations of signals can be used [38, 62]. e.g. for G6P, the complete molecule containing six carbons and a fragment containing the last four carbons (C3-C6) could be measured. The C1-C2 fragment is unmeasured. The distributions of the different fragments are related. e.g. a fully labeled whole fragment would produce two fully labeled fragments, resp. two fully labelled fragments will result in a fully labelled whole molecule. In general, the measurement of the whole molecule can be calculated from the two fragment measurements (W: C1-C6 G6P, V:C3-C6 fragment, U:C1-C2 fragment with the mass isotopomer distributions  $\mathbf{w} = (w_0, w_1, \dots, w_6)^T$ ,  $\mathbf{v} = (v_0, v_1, \dots, v_4)^T$

and  $\mathbf{u} = (u_0, u_1, u_2)^T$ ):

$$\begin{array}{l}
 w_0 = u_0 v_0 \\
 w_1 = u_1 v_0 + u_0 v_1 \\
 w_2 = u_2 v_0 + u_1 v_1 + u_0 v_2 \\
 w_3 = u_2 v_1 + u_1 v_2 + u_0 v_3 \\
 w_4 = u_2 v_2 + u_1 v_3 + u_0 v_4 \\
 w_5 = u_2 v_3 + u_1 v_4 \\
 w_6 = u_2 v_4
 \end{array}
 \quad \text{with: } \mathbf{B}(\mathbf{v}) = \begin{pmatrix}
 v_0 & & & & & & \\
 v_1 & v_0 & & & & & \\
 v_2 & v_1 & v_0 & & & & \\
 v_3 & v_2 & v_1 & & & & \\
 v_4 & v_3 & v_2 & & & & \\
 & v_4 & v_3 & & & & \\
 & & v_4 & & & & 
 \end{pmatrix} \quad (1)$$

$$\underbrace{\mathbf{w}}_{\mathbf{w}} = \underbrace{\mathbf{B}(\mathbf{v})}_{\mathbf{B}(\mathbf{v})} \mathbf{u}$$

The equations can be rewritten to calculate the distribution of the unmeasured C1-C2 (u) fragment as a function of the measurements of C1-C6 (w) and C3-C6 (v). This

system has ‘hidden’ additional equations, e.g.  $\sum_u u_i = 1, \sum_v v_i = 1, \sum_w w_i = 1$ . Also,

negative fractions are physically impossible. Therefore, the solution for the non-measured fragment U is best obtained by:

$$\hat{\mathbf{u}} = \arg \min_{\mathbf{u}} \left\| \mathbf{w} - \mathbf{B}(\mathbf{v})\mathbf{u} \right\| \quad (2)$$
$$\sum_{\mathbf{u}=1}^{\mathbf{u} \geq 0}$$

The optimization can be solved using quadratic programming, here quadprog of MatLab was used.

**Table S1:** Measured biomass specific uptake and secretion rates [mmol/Cmol/h]

| <b>Name</b>       | <b>Rate</b>          |        |
|-------------------|----------------------|--------|
|                   | <b>[mmol/Cmol/h]</b> |        |
| <b>biomass</b>    | 54.66                | ± 1.33 |
| <b>CO2:ext</b>    | 47.37                | ± 2.17 |
| <b>EtOH:ext</b>   | -8.55                | ± 0.31 |
| <b>ExPept:ext</b> | 2.42                 | ± 0.32 |
| <b>glc:ext</b>    | -16.12               | ± 0.58 |
| <b>O2:ext</b>     | -52.44               | ± 2.13 |
| <b>PAA:ext</b>    | -0.51                | ± 0.04 |
| <b>penG:ext</b>   | 0.51                 | ± 0.05 |
| <b>psacch:ext</b> | 5.66                 | ± 0.76 |

**Table S3:** Metabolic flux analysis results [mmol/Cmol/h].

|        |        |        |        |        |      |        |      |        |       |        |       |        |       |       |        |       |       |
|--------|--------|--------|--------|--------|------|--------|------|--------|-------|--------|-------|--------|-------|-------|--------|-------|-------|
| r1.1   | 16.17  | r10.18 | 0.33   | r11.16 | 2.39 | r11.32 | 0.14 | r13.5  | 0.05  | r16.5  | 0.12  | r19.4  | 0.51  | r4.2  | 15.11  | r8.2  | 0.18  |
| r1.2   | 3.96   | r10.19 | 0.42   | r11.17 | 0.22 | r11.33 | 0.42 | r13.6  | 0.05  | r16.6  | 0.12  | r2.1   | 8.76  | r4.3  | 15.11  | r8.3  | 0.36  |
| r1.3   | 8.71   | r10.2  | 4.79   | r11.18 | 1.21 | r11.34 | 0.53 | r13.7  | -0.06 | r16.7  | 0.11  | r2.2   | 8.76  | r4.4  | 9.96   | r8.4  | 0.16  |
| r1.4   | 8.71   | r10.20 | 4.79   | r11.19 | 0.59 | r11.35 | 0.55 | r13.8  | 0.16  | r16.8  | 0.09  | r2.3   | 2.92  | r4.5  | 1.97   | r8.5  | 0.16  |
| r1.5   | 19.77  | r10.21 | 4.79   | r11.2  | 1.92 | r11.36 | 0.55 | r13.9  | 0.05  | r16.9  | 0.09  | r2.4   | 5.35  | r4.6  | 3.19   | r9.1  | 38.19 |
| r1.6   | 19.77  | r10.24 | 0.55   | r11.20 | 0.24 | r11.37 | 0.55 | r14.1  | 0.30  | r17.1  | 19.99 | r2.5   | 2.92  | r4.7  | 13.47  | r9.11 | 0.51  |
| r1.7   | 18.11  | r10.3  | 128.90 | r11.21 | 0.26 | r11.4  | 0.33 | r15.1  | 82.09 | r17.2  | 0.45  | r2.6   | 2.92  | r4.8  | 14.02  | r9.13 | 2.41  |
| r1.8   | 18.11  | r10.5  | 168.40 | r11.22 | 0.68 | r11.5  | 0.33 | r16.1  | 0.02  | r17.3  | 0.14  | r2.7   | 2.42  | r4.9  | 14.02  | r9.14 | 5.63  |
| r1.9   | 17.25  | r10.6  | 3.19   | r11.23 | 1.38 | r11.6  | 0.33 | r16.10 | 0.05  | r17.4  | 0.14  | r21.1  | 0.51  | r5.1  | 2.87   | r9.15 | 81.58 |
| r10.1  | 171.10 | r10.7  | 0.33   | r11.24 | 0.96 | r11.7  | 0.26 | r16.11 | 0.02  | r17.5  | 0.05  | r21.13 | 1.02  | r5.3  | 0.48   | r9.18 | 8.57  |
| r10.10 | 0.26   | r10.8  | 2.71   | r11.25 | 0.42 | r11.8  | 0.26 | r16.12 | 0.01  | r17.6  | 0.05  | r21.14 | -1.02 | r6.1b | 49.82  | r9.2  | 0.41  |
| r10.11 | 13.76  | r10.9  | 0.26   | r11.26 | 0.42 | r11.9  | 1.66 | r16.13 | 0.16  | r17.7  | 0.05  | r21.15 | 1.02  | r6.2b | 39.00  | r9.20 | 10.69 |
| r10.12 | 37.44  | r11.1  | 9.11   | r11.27 | 0.43 | r12.1  | 4.86 | r16.14 | 0.03  | r17.8  | 0.07  | r21.2  | 0.51  | r6.3b | 14.02  | r9.3  | 16.17 |
| r10.13 | 0.61   | r11.10 | 0.65   | r11.28 | 0.25 | r12.2  | 4.86 | r16.15 | 0.03  | r18.18 | 8.19  | r21.6  | 0.51  | r6.4  | 158.60 | r9.4  | 0.62  |
| r10.14 | 3.19   | r11.11 | 0.62   | r11.29 | 0.13 | r13.1  | 0.18 | r16.16 | 0.03  | r18.3  | 46.40 | r21.7  | 0.51  | r7.1  | 8.57   | r9.6  | 52.35 |
| r10.15 | 0.26   | r11.12 | 0.62   | r11.3  | 0.32 | r13.2  | 0.10 | r16.2  | 0.12  | r19.1  | 0.51  | r4.1   | 10.74 | r7.2  | 9.19   | r9.7  | 47.46 |
| r10.16 | 1.55   | r11.13 | 0.62   | r11.30 | 0.05 | r13.3  | 0.08 | r16.3  | 0.29  | r19.2  | 0.51  | r4.10  | 14.63 | r7.3  | 8.57   | r9.8  | 0.51  |
| r10.17 | 0.96   | r11.14 | 0.62   | r11.31 | 0.49 | r13.4  | 0.12 | r16.4  | 0.27  | r19.3  | 0.51  | r4.11  | 15.11 | r8.1  | -0.11  |       |       |

**Table S5:**  $^{13}\text{C}$  flux analysis results\*

| intra- and extracellular fluxes (mmol/Cmol/h) |        |        |        |         |       |          |       |          |       |          |       |
|-----------------------------------------------|--------|--------|--------|---------|-------|----------|-------|----------|-------|----------|-------|
| r1.1F                                         | 33.35  | r2.6F  | 12.08  | r5.5F   | 0.00  | r11.1B   | 44.63 | r11.24F  | 0.96  | rz.5bB   | 80.12 |
| r1.2B                                         | 186.53 | r2.7B  | 23.76  | r7.1F   | 8.57  | r11.1F   | 61.26 | r11.25F  | 0.42  | rz.5bF   | 80.12 |
| r1.2F                                         | 190.48 | r2.7F  | 26.19  | r7.2F   | 9.19  | r11.2B   | 7.88  | r11.26F  | 0.42  | rz.6aB   | 0.00  |
| r1.3F                                         | 15.95  | r3.1F  | 0.13   | r8.1F   | 0.11  | r11.2F   | 9.80  | r11.32aF | 0.14  | rz.6aF   | 0.00  |
| r1.4bB                                        | 38.78  | r3.2F  | 7.25   | r8.4F   | 0.16  | r11.3F   | 0.03  | r11.32bF | 0.14  | rz.6bB   | 20.32 |
| r1.4bF                                        | 47.48  | r4.1F  | 11.02  | r9.3F   | 26.88 | r11.4F   | 0.33  | r11.35F  | 0.55  | rz.6bF   | 20.32 |
| r1.4B                                         | 14.04  | r4.2F  | 14.09  | r9.7F   | 47.46 | r11.5F   | 0.33  | r16.9F   | 0.09  | rz.6cB   | 9.68  |
| r1.4F                                         | 22.74  | r4.3B  | 61.27  | r9.14F  | 0.94  | r11.6F   | 0.33  | r16.13F  | 1.58  | rz.6cF   | 9.68  |
| r1.5B                                         | 342.16 | r4.3F  | 75.25  | r9.18F  | 8.57  | r11.7F   | 0.26  | r17.1F   | 16.28 | rz.7bB   | 0.01  |
| r1.5F                                         | 361.92 | r4.4F  | 3.26   | r10.4B  | 7.73  | r11.8F   | 0.26  | r21.8F   | 0.00  | rz.7bF   | 2.47  |
| r1.6B                                         | 0.35   | r4.6F  | 10.72  | r10.4F  | 13.10 | r11.9F   | 1.66  | r21.10F  | 0.00  | rz.7cB*  | 0.00  |
| r1.6F                                         | 20.12  | r4.7xF | 2.40   | r10.6B  | 0.57  | r11.10F  | 0.65  | r21.11F  | 0.00  | rz.7cF*  | 0.00  |
| r1.7B                                         | 245.19 | r4.7yF | 2.40   | r10.6F  | 11.28 | r11.13F  | 0.62  | rz.1F    | 0.17  | rz.7B*   | 0.00  |
| r1.7F                                         | 263.29 | r4.9xB | 3.43   | r10.8F  | 5.16  | r11.15F  | 0.00  | rz.2aF   | 0.17  | rz.7F*   | 0.00  |
| r1.8B                                         | 134.39 | r4.9xF | 8.78   | r10.10F | 0.26  | r11.16B  | 47.86 | rz.2bF   | 0.07  | rz.8aF   | 13.06 |
| r1.8F                                         | 152.50 | r4.9yB | 3.43   | r10.11F | 14.04 | r11.16F  | 50.25 | rz.3bF   | 0.07  | rz.8bF   | 13.06 |
| r1.9F                                         | 17.37  | r4.9yF | 8.78   | r10.12F | 20.39 | r11.17B  | 0.00  | rz.3F    | 0.00  | rz.8c1F  | 7.82  |
| r2.1F                                         | 8.76   | r4.10B | 237.79 | r10.13F | 3.07  | r11.17F  | 0.22  | rz.4a2B  | 0.59  | rz.8d1F* | 11.32 |
| r2.2F*                                        | 8.76   | r4.10F | 251.57 | r10.14B | 0.36  | r11.18F  | 1.21  | rz.4a2F  | 0.66  | rz.8d2F* | 11.32 |
| r2.3B                                         | 17.78  | r4.11B | 0.10   | r10.14F | 11.19 | r11.19F  | 0.59  | rz.4aB   | 0.59  | rz.9bF   | 10.64 |
| r2.3F                                         | 20.71  | r4.11F | 14.19  | r10.15F | 0.26  | r11.20F  | 0.24  | rz.4aF   | 0.66  | rz.9c2F  | 6.47  |
| r2.4B                                         | 95.00  | r5.1F  | 2.71   | r10.16F | 1.55  | r11.21aF | 0.26  | rz.4bB   | 7.36  | rz.9cF   | 6.47  |
| r2.4F                                         | 100.35 | r5.2F  | 0.11   | r10.17F | 0.96  | r11.21bF | 0.26  | rz.4bF   | 7.36  | rz.9dF   | 0.10  |
| r2.5B                                         | 0.00   | r5.3B  | 0.30   | r10.18F | 0.33  | r11.22B  | 15.24 | rz.4cF   | 0.14  | rz.9F    | 10.64 |

|       |      |       |      |         |      |         |       |        |      |  |
|-------|------|-------|------|---------|------|---------|-------|--------|------|--|
| r2.5F | 2.92 | r5.3F | 0.61 | r10.19F | 0.42 | r11.22F | 15.91 | rz.5aB | 0.02 |  |
| r2.6B | 9.16 | r5.4F | 0.00 | r10.21F | 3.07 | r11.23F | 1.38  | rz.5aF | 0.02 |  |

**biomass synthesis fluxes (mmol/Cmol/h)**

|           |      |            |      |          |      |            |      |            |      |            |      |
|-----------|------|------------|------|----------|------|------------|------|------------|------|------------|------|
| bm_accoa* | 3.35 | bm_aspfum* | 0.28 | bm_eseA* | 1.58 | bm_glnglu* | 1.11 | bm_lys*    | 0.26 | bm_pro*    | 0.03 |
| bm_akg*   | 0.38 | bm_co2*    | 0.18 | bm_f6p*  | 0.45 | bm_glu*    | 0.38 | bm_met*    | 0.07 | bm_prpp*   | 0.35 |
| bm_ala*   | 0.68 | bm_cys*    | 0.55 | bm_fthf* | 0.31 | bm_gly*    | 0.76 | bm_myth*f  | 0.16 | bm_psacch* | 2.39 |
| bm_arg*   | 0.33 | bm_e4p*    | 0.43 | bm_g6p*  | 0.02 | bm_his*    | 0.14 | bm_pep*    | 0.87 | bm_pyr*    | 0.05 |
| bm_asn*   | 0.22 | bm_e4p0*   | 0.07 | bm_gap*  | 0.07 | bm_ile*    | 0.26 | bm_pep2*   | 0.81 | bm_ser*    | 0.37 |
| bm_asp*   | 0.35 | bm_e4p1*   | 0.43 | bm_gln*  | 0.34 | bm_leu*    | 0.42 | bm_phetaA* | 0.09 | bm_thr*    | 0.33 |
|           |      |            |      |          |      |            |      |            |      | bm_val*    | 0.96 |

\*Flux names ending on 'F' are forward fluxes. 'B' represent backward fluxes. Fluxes with an asterisk '\*' have been excluded from the statistical analysis (fixed). The biomass synthesis fluxes are calculated based on the biomass composition and the growth rate.

**Tabel S7:** Measured, assumed and estimated concentrations (intracellular  $\mu\text{mol/g}_{\text{DW}}$ , extracellular  $\text{mmol/L}$ ).

| <i>Met.</i>        | <i>c</i> | <i>Met.</i>          | <i>c</i> | <i>Met.</i> | <i>c</i> | <i>Met.</i>        | <i>c</i> | <i>Met.</i> | <i>c</i> | <i>Met.</i>        | <i>c</i> | <i>Met.</i>           | <i>c</i> | <i>Met.</i> | <i>c</i> |
|--------------------|----------|----------------------|----------|-------------|----------|--------------------|----------|-------------|----------|--------------------|----------|-----------------------|----------|-------------|----------|
| aAd_c*             | 2.16     | bIM_m <sup>+</sup>   | 0.61     | E4Pbio*     | 3.61     | G6P_c              | 3.29     | HOMCYS_c    | 0.18     | MAL_p              | 0.25     | PG6_c                 | 0.07     | SER_c       | 4.77     |
| AcCoA_c*           | 0.10     | BPG_c*               | 0.004    | E4Pbio2*    | 3.61     | GAP_c <sup>+</sup> | 0.01     | HOMSER_c    | 3.61     | Manol_c            | 174.73   | PhetaA_c*             | 3.61     | SUCC_c      | 0.50     |
| AcCoA_m*           | 0.01     | carbP_m*             | 3.61     | Erytol_c    | 9.21     | GLC_c              | 0.65     | ICITR_c     | 0.033    | Manol_ext          | 0.58     | PRO_c                 | 0.78     | SUCC_m      | 0.06     |
| AcCoA_p*           | 0.01     | CITR_c               | 1.53     | Erytol_ext  | 0.12     | GLC_ext            | 0.002    | ICITR_m     | 0.004    | MET_c              | 0.08     | Psacch_c <sup>+</sup> | 22.47    | SUCC_p      | 0.06     |
| aKG_c              | 0.52     | CITR_m               | 0.15     | ESEA_c*     | 3.61     | GLN_c              | 26.32    | ICITR_p     | 0.004    | mRNA <sup>+</sup>  | 539      | PYR_c                 | 0.46     | THR_c       | 4.33     |
| aKG_m              | 0.06     | CO2_c*               | 1.30     | EtOH_c*     | 0.18     | GLN_m              | 2.63     | ILE_c       | 0.24     | MYTHF_c*           | 0.18     | PYR_ext               | 0.04     | THR_m       | 0.04     |
| aKI_m <sup>+</sup> | 5.60     | CO2_ext <sup>+</sup> | 11.5     | EtOH_ext    | 0.67     | GLU_c              | 44.40    | ILE_m       | 0.02     | OAA_c <sup>+</sup> | 0.04     | PYR_m                 | 0.05     | TRE_c       | 20.40    |
| ALA_c              | 13.75    | CO2_m                | 0.14     | F6P_c       | 0.68     | GLU_m              | 4.44     | ILEA_m*     | 3.61     | OAA_m <sup>+</sup> | 0.14     | R5P_c*                | 0.74     | TRE_ext     | 0.02     |
| ARG_c              | 3.61     | ctl_c*               | 3.61     | FBP_c       | 0.36     | GLY_c              | 1.48     | LEU_c       | 0.69     | PEP_c              | 0.16     | Rbtol_c               | 4.01     | TRE6P_c     | 0.20     |
| ASN_c              | 1.23     | CYS_c                | 0.12     | FTHF_c*     | 0.18     | GLYOX_p*           | 0.18     | LYS_c       | 0.99     | PEPbio*            | 3.61     | Rbtol_ext             | 0.03     | VAL_c       | 2.11     |
| ASP_c              | 14.69    | DHAP_c               | 0.13     | FUM_c       | 0.70     | HIS_c              | 1.05     | MAL_c       | 1.99     | PG2_c              | 0.08     | Rib5P_c               | 0.72     | VAL_m       | 0.23     |
| bIM_c <sup>+</sup> | 0.0001   | E4P_c                | 0.004    | FUM_m       | 0.08     | HISA_c*            | 3.61     | MAL_m       | 0.25     | PG3_c              | 0.87     | Sed7P_c               | 2.20     | Xylu5P      | 0.74     |

All concentrations in  $\mu\text{mol/g}_{\text{DW}}$ , except extracellular metabolites ('\_ext') in  $\text{mmol/L}$ .

\* fixed value (assumption). Based on preliminary results (AcCoA), thermodynamic considerations (R5P (eq. with Xylu5P), EtOH (eq. with extracellular space) or when unknown set to 0.1  $\text{mmol/Cmol}$  (3.61  $\mu\text{mol/g}_{\text{DW}}$ ) except BPG (0.0001  $\text{mmol/Cmol}$ ).

+ determined from parameter estimation. The initial value for CO2\_ext in the extracellular space is based on calculations (Henry's law and bicarbonate equilibrium), resulting in a pool concentration of 0.54  $\text{mmol/L}$ . The large deviation could originate from the headspace and delays in the MS device. The initial value for the mRNA pool size originates from the biomass composition (431  $\mu\text{mol/g}_{\text{DW}}$ ).
